# Supplementary material
Source: Springer Nature journal article supplement (https://www.springermedizin.de/resource/supplementary/12943_2010_763_MOESM4_ESM.pdf/9554768)

**A**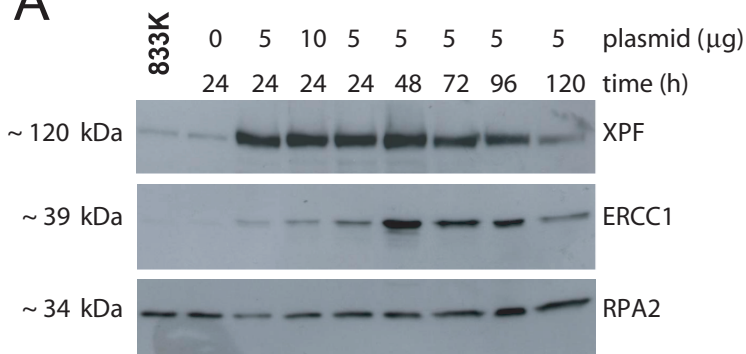**B**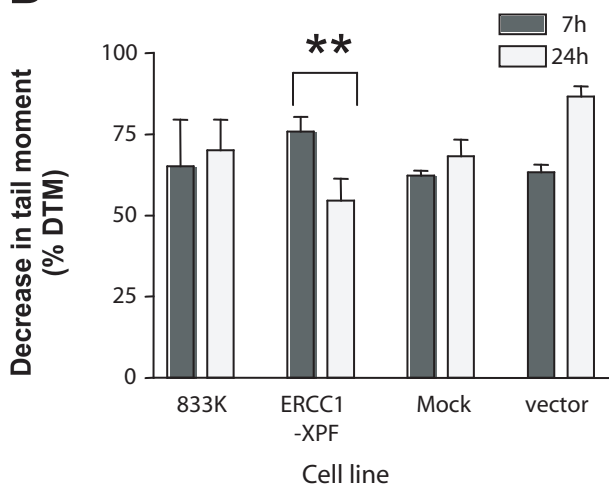**C**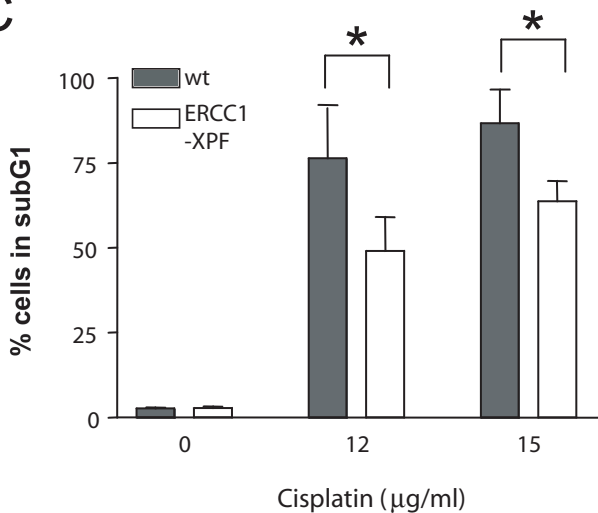

Supplement: MOESM4 [file 9554768]
